# Supplementary material
Source: publisher figshare collection journal article supplement (https://sage.figshare.com/ndownloader/files/18169412)

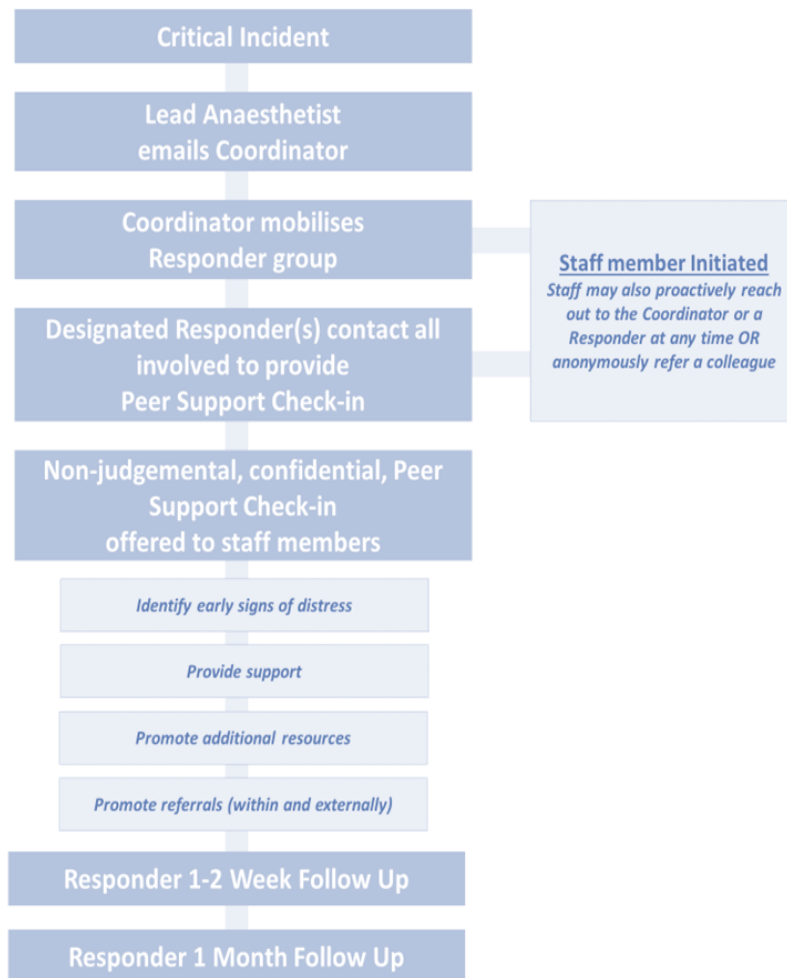

Supplement: Supplementary file 1 [file 18169412]
